# Supplementary material for: Comparative Safety Profiling of Sorafenib, Regorafenib, and Lenvatinib in Hepatobiliary-Pancreatic Tumors: Signal Mining and Risk Factor Analysis Using the US FDA Adverse Event Reporting System
Source: Research Square preprint supplement (doi:10.21203/rs.3.rs-8223458/v1), 2026-02-22
Supplement: Supplementary file 1 [file 4b42bea810466bd2ff1a61d2.docx]

| soc_name_en | Report number Lenvatinib | ROR  (95%Cl) | PRR  (**χ²**) | IC  (IC025) | EBGM  (EBGM05) |
| --- | --- | --- | --- | --- | --- |
| GASTROINTESTINAL DISORDERS | 2618 | 1.43  ( 1.36 - 1.5 ) | 1.34 ( 223.46 ) | 0.36 ( 0.3 ) | 1.28  ( 1.23 ) |
| INVESTIGATIONS | 1463 | 1.45  ( 1.37 - 1.54 ) | 1.4 ( 149.42 ) | 0.41 ( 0.32 ) | 1.33  ( 1.26 ) |
| NERVOUS SYSTEM DISORDERS | 1226 | 1.81  ( 1.69 - 1.93 ) | 1.74 ( 316.1 ) | 0.65 ( 0.56 ) | 1.57  ( 1.49 ) |
| METABOLISM AND NUTRITION DISORDERS | 1132 | 2.01  ( 1.87 - 2.15 ) | 1.92 ( 402.06 ) | 0.77 ( 0.67 ) | 1.7  ( 1.61 ) |
| HEPATOBILIARY DISORDERS | 751 | 1.2  ( 1.11 - 1.3 ) | 1.19 ( 19.75 ) | 0.21 ( 0.1 ) | 1.16  ( 1.08 ) |
| RESPIRATORY, THORACIC AND MEDIASTINAL DISORDERS | 599 | 1.11  ( 1.01 - 1.21 ) | 1.1  ( 5.16 ) | 0.12 ( -0.01 ) | 1.09  ( 1.01 ) |
| VASCULAR DISORDERS | 572 | 1.58  ( 1.44 - 1.73 ) | 1.55 ( 92.49 ) | 0.53 ( 0.39 ) | 1.44  ( 1.33 ) |
| RENAL AND URINARY DISORDERS | 488 | 1.4  ( 1.26 - 1.54 ) | 1.38 ( 43.45 ) | 0.39 ( 0.25 ) | 1.31  ( 1.21 ) |
| PSYCHIATRIC DISORDERS | 251 | 1.3  ( 1.14 - 1.49 ) | 1.3 ( 14.28 ) | 0.32 ( 0.12 ) | 1.25  ( 1.11 ) |
| ENDOCRINE DISORDERS | 224 | 1.46  ( 1.26 - 1.7 ) | 1.46 ( 26.26 ) | 0.45 ( 0.24 ) | 1.37  ( 1.21 ) |
