# Supplementary material for: Comparative Safety Profiling of Sorafenib, Regorafenib, and Lenvatinib in Hepatobiliary-Pancreatic Tumors: Signal Mining and Risk Factor Analysis Using the US FDA Adverse Event Reporting System
Source: Research Square preprint supplement (doi:10.21203/rs.3.rs-8223458/v1), 2026-02-22
Supplement: Supplementary file 2 [file 623fa5db1b524349ae8b9077.docx]

| soc_name_en | Report number Regorafenib | ROR  (95%Cl) | PRR  (**χ²**) | IC  (IC025) | EBGM  (EBGM05) |
| --- | --- | --- | --- | --- | --- |
| NEOPLASMS BENIGN, MALIGNANT AND UNSPECIFIED (INCL CYSTS AND POLYPS) | 316 | 1.53  ( 1.36 - 1.73 ) | 1.48 ( 50.55 ) | 0.55 ( 0.37 ) | 1.46  ( 1.32 ) |
| SKIN AND SUBCUTANEOUS TISSUE DISORDERS | 286 | 1.29  ( 1.14 - 1.46 ) | 1.27 ( 16.68 ) | 0.33 ( 0.15 ) | 1.26  ( 1.13 ) |
| INJURY, POISONING AND PROCEDURAL COMPLICATIONS | 263 | 1.18  ( 1.04 - 1.35 ) | 1.17 ( 6.64 ) | 0.22 ( 0.03 ) | 1.16  ( 1.04 ) |
| NERVOUS SYSTEM DISORDERS | 224 | 1.17  ( 1.02 - 1.35 ) | 1.16 ( 5.12 ) | 0.21 ( 0.01 ) | 1.15  ( 1.03 ) |
| RESPIRATORY, THORACIC AND MEDIASTINAL DISORDERS | 182 | 1.36  ( 1.17 - 1.59 ) | 1.34 ( 15.93 ) | 0.41 ( 0.19 ) | 1.33  ( 1.17 ) |
| MUSCULOSKELETAL AND CONNECTIVE TISSUE DISORDERS | 144 | 1.64  ( 1.38 - 1.95 ) | 1.62 ( 32.75 ) | 0.66 ( 0.41 ) | 1.58  ( 1.37 ) |
| EYE DISORDERS | 33 | 1.6  ( 1.13 - 2.28 ) | 1.6  ( 7.01 ) | 0.65 ( 0.14 ) | 1.56  ( 1.17 ) |
| SOCIAL CIRCUMSTANCES | 9 | 2.25  ( 1.14 - 4.45 ) | 2.25 ( 5.78 ) | 1.11 ( 0.16 ) | 2.16  ( 1.22 ) |
