# Supplementary material for: Comparative Safety Profiling of Sorafenib, Regorafenib, and Lenvatinib in Hepatobiliary-Pancreatic Tumors: Signal Mining and Risk Factor Analysis Using the US FDA Adverse Event Reporting System
Source: Research Square preprint supplement (doi:10.21203/rs.3.rs-8223458/v1), 2026-02-22
Supplement: Supplementary file 3 [file 67c9b6c8bd8cde25835f3aed.docx]

| pt_name_en | Report number Sorafenib | ROR  (95%Cl) | PRR  (χ²) | IC  (IC025) | EBGM  (EBGM05) |
| --- | --- | --- | --- | --- | --- |
| HEPATOCELLULAR CARCINOMA | 1732 | 5.93  ( 5.46 - 6.45 ) | 5.6 ( 2220.23 ) | 1.33 ( 1.24 ) | 2.52  ( 2.35 ) |
| DIARRHOEA | 942 | 1.38  ( 1.27 - 1.49 ) | 1.36 ( 63 ) | 0.31 ( 0.21 ) | 1.24  ( 1.16 ) |
| PALMAR-PLANTAR ERYTHRODYSAESTHESIA SYNDROME | 658 | 3.19  ( 2.85 - 3.57 ) | 3.14 ( 453.8 ) | 1 ( 0.86 ) | 2  ( 1.82 ) |
| ASTHENIA | 445 | 1.79  ( 1.59 - 2.02 ) | 1.77 ( 92.61 ) | 0.56 ( 0.4 ) | 1.47  ( 1.33 ) |
| WEIGHT DECREASED | 348 | 1.98  ( 1.72 - 2.27 ) | 1.96 ( 96.98 ) | 0.64 ( 0.46 ) | 1.56  ( 1.39 ) |
| ABDOMINAL PAIN | 274 | 1.5  ( 1.29 - 1.74 ) | 1.49 ( 29.28 ) | 0.4 ( 0.2 ) | 1.32  ( 1.17 ) |
| RASH | 273 | 1.57  ( 1.35 - 1.83 ) | 1.57 ( 35.91 ) | 0.44 ( 0.24 ) | 1.36  ( 1.2 ) |
| PAIN IN EXTREMITY | 260 | 3.67  ( 3.05 - 4.42 ) | 3.64 ( 215.79 ) | 1.1 ( 0.87 ) | 2.14  ( 1.83 ) |
| BLISTER | 198 | 4.04  ( 3.25 - 5.03 ) | 4.02 ( 183.33 ) | 1.16 ( 0.9 ) | 2.23  ( 1.86 ) |
| PAIN | 193 | 1.67  ( 1.4 - 2 ) | 1.67 ( 32.45 ) | 0.5 ( 0.26 ) | 1.42  ( 1.22 ) |
| DRY SKIN | 189 | 3.3  ( 2.67 - 4.07 ) | 3.28 ( 137.34 ) | 1.03 ( 0.77 ) | 2.04  ( 1.71 ) |
| ABDOMINAL PAIN UPPER | 188 | 2  ( 1.66 - 2.42 ) | 2 ( 54.41 ) | 0.66 ( 0.41 ) | 1.58  ( 1.35 ) |
| ALOPECIA | 182 | 3.13  ( 2.53 - 3.88 ) | 3.12 ( 123.43 ) | 1 ( 0.73 ) | 1.99  ( 1.67 ) |
| PRURITUS | 176 | 1.55  ( 1.29 - 1.87 ) | 1.55 ( 21.9 ) | 0.43 ( 0.18 ) | 1.35  ( 1.16 ) |
| HOSPITALISATION | 170 | 4.53  ( 3.55 - 5.79 ) | 4.51 ( 176.78 ) | 1.22 ( 0.94 ) | 2.33  ( 1.9 ) |
| BLOOD PRESSURE INCREASED | 165 | 1.25  ( 1.04 - 1.5 ) | 1.25 ( 5.6 ) | 0.23 ( -0.03 ) | 1.17  ( 1 ) |
| DYSPNOEA | 165 | 1.31  ( 1.09 - 1.58 ) | 1.31 ( 8.17 ) | 0.27 ( 0.02 ) | 1.21  ( 1.04 ) |
| METASTASES TO LUNG | 152 | 3.97  ( 3.1 - 5.09 ) | 3.96 ( 138.34 ) | 1.15 ( 0.85 ) | 2.21  ( 1.8 ) |
| GAIT DISTURBANCE | 146 | 3.78  ( 2.94 - 4.85 ) | 3.76 ( 125.71 ) | 1.12 ( 0.82 ) | 2.17  ( 1.76 ) |
| SKIN EXFOLIATION | 145 | 3.86  ( 3 - 4.97 ) | 3.85 ( 127.93 ) | 1.13 ( 0.83 ) | 2.19  ( 1.77 ) |
| ABDOMINAL DISTENSION | 139 | 2.19  ( 1.75 - 2.73 ) | 2.18 ( 49.72 ) | 0.73 ( 0.44 ) | 1.66  ( 1.38 ) |
| ERYTHEMA | 138 | 2.55  ( 2.02 - 3.21 ) | 2.54 ( 67.22 ) | 0.85 ( 0.55 ) | 1.8  ( 1.48 ) |
| GENERAL PHYSICAL HEALTH DETERIORATION | 138 | 1.44  ( 1.17 - 1.77 ) | 1.44 ( 12.1 ) | 0.36 ( 0.08 ) | 1.29  ( 1.08 ) |
| DYSPHONIA | 136 | 1.32  ( 1.07 - 1.62 ) | 1.32 ( 7.04 ) | 0.28 ( 0 ) | 1.21  ( 1.02 ) |
| HEADACHE | 134 | 1.44  ( 1.16 - 1.77 ) | 1.43 ( 11.59 ) | 0.36 ( 0.07 ) | 1.29  ( 1.08 ) |
| PERIPHERAL SWELLING | 130 | 2.77  ( 2.17 - 3.53 ) | 2.76 ( 73.1 ) | 0.91 ( 0.6 ) | 1.88  ( 1.53 ) |
| DIZZINESS | 124 | 1.39  ( 1.12 - 1.72 ) | 1.39 ( 8.88 ) | 0.33 ( 0.03 ) | 1.26  ( 1.05 ) |
| CONFUSIONAL STATE | 113 | 1.36  ( 1.09 - 1.71 ) | 1.36 ( 7.29 ) | 0.31 ( 0 ) | 1.24  ( 1.03 ) |
| ALPHA 1 FOETOPROTEIN INCREASED | 102 | 4.15  ( 3.05 - 5.64 ) | 4.14 ( 97.29 ) | 1.17 ( 0.81 ) | 2.26  ( 1.74 ) |
| OEDEMA PERIPHERAL | 97 | 1.34  ( 1.05 - 1.71 ) | 1.34 ( 5.6 ) | 0.3 ( -0.04 ) | 1.23  ( 1 ) |
| COUGH | 97 | 1.93  ( 1.49 - 2.5 ) | 1.93 ( 25.48 ) | 0.63 ( 0.28 ) | 1.55  ( 1.24 ) |
| FALL | 87 | 1.5  ( 1.16 - 1.95 ) | 1.5 ( 9.43 ) | 0.41 ( 0.05 ) | 1.32  ( 1.06 ) |
| HYPERKERATOSIS | 83 | 8.51  ( 5.51 - 13.13 ) | 8.48 ( 134.61 ) | 1.5 ( 1.09 ) | 2.84  ( 1.97 ) |
| CHEST PAIN | 82 | 2.41  ( 1.79 - 3.24 ) | 2.41 ( 36.09 ) | 0.81 ( 0.42 ) | 1.75  ( 1.37 ) |
| ABDOMINAL DISCOMFORT | 69 | 1.83  ( 1.35 - 2.49 ) | 1.83 ( 15.66 ) | 0.58 ( 0.18 ) | 1.5  ( 1.16 ) |
| MUSCLE SPASMS | 68 | 2.14  ( 1.56 - 2.93 ) | 2.13 ( 23.1 ) | 0.71 ( 0.3 ) | 1.64  ( 1.26 ) |
| INSOMNIA | 64 | 1.44  ( 1.06 - 1.94 ) | 1.44 ( 5.58 ) | 0.36 ( -0.05 ) | 1.29  ( 1 ) |
| FAECES DISCOLOURED | 61 | 4.22  ( 2.83 - 6.28 ) | 4.21 ( 59.14 ) | 1.18 ( 0.72 ) | 2.27  ( 1.63 ) |
| MUSCULAR WEAKNESS | 60 | 1.49  ( 1.09 - 2.04 ) | 1.49 ( 6.32 ) | 0.4 ( -0.03 ) | 1.32  ( 1.01 ) |
| FEEDING DISORDER | 59 | 2.86  ( 1.99 - 4.12 ) | 2.86 ( 35.01 ) | 0.94 ( 0.48 ) | 1.91  ( 1.41 ) |
| MOBILITY DECREASED | 59 | 8.59  ( 5.12 - 14.4 ) | 8.57 ( 96.15 ) | 1.51 ( 1.01 ) | 2.84  ( 1.84 ) |
| HAEMOGLOBIN DECREASED | 57 | 1.77  ( 1.27 - 2.47 ) | 1.77 ( 11.59 ) | 0.55 ( 0.11 ) | 1.47  ( 1.11 ) |
| PAIN OF SKIN | 56 | 19.35  ( 9.23 - 40.6 ) | 19.31 ( 121.65 ) | 1.72 ( 1.19 ) | 3.29  ( 1.77 ) |
| ADVERSE DRUG REACTION | 53 | 1.52  ( 1.09 - 2.13 ) | 1.52 ( 6.15 ) | 0.42 ( -0.04 ) | 1.34  ( 1.01 ) |
| BURNING SENSATION | 53 | 6.37  ( 3.9 - 10.39 ) | 6.36 ( 72.48 ) | 1.39 ( 0.88 ) | 2.62  ( 1.74 ) |
| SKIN LESION | 52 | 10.27  ( 5.69 - 18.53 ) | 10.25 ( 92.12 ) | 1.57 ( 1.04 ) | 2.96  ( 1.81 ) |
| METASTASES TO BONE | 52 | 1.73  ( 1.22 - 2.45 ) | 1.73 ( 9.83 ) | 0.53 ( 0.07 ) | 1.45  ( 1.08 ) |
| HYPOPHAGIA | 52 | 2.43  ( 1.68 - 3.54 ) | 2.43 ( 23.33 ) | 0.82 ( 0.34 ) | 1.76  ( 1.29 ) |
| GAIT INABILITY | 48 | 3.01  ( 2 - 4.54 ) | 3.01 ( 30.84 ) | 0.97 ( 0.46 ) | 1.96  ( 1.39 ) |
| FEELING ABNORMAL | 46 | 2.05  ( 1.4 - 3 ) | 2.05 ( 14.16 ) | 0.68 ( 0.18 ) | 1.6  ( 1.16 ) |
