# Supplementary material for: Comparative Safety Profiling of Sorafenib, Regorafenib, and Lenvatinib in Hepatobiliary-Pancreatic Tumors: Signal Mining and Risk Factor Analysis Using the US FDA Adverse Event Reporting System
Source: Research Square preprint supplement (doi:10.21203/rs.3.rs-8223458/v1), 2026-02-22
Supplement: Supplementary file 4 [file 961b529113dc4ab919c3fcfa.docx]

|  | Sorafenib  (N=5195) | Regorafenib  (N=720) | Lenvatinib  (N=4878) |
| --- | --- | --- | --- |
| SEX |  |  |  |
| F | 963 (18.5%) | 150 (20.8%) | 922 (18.9%) |
| M | 3910 (75.3%) | 509 (70.7%) | 3667 (75.2%) |
| SEX_Missing | 322 (6.2%) | 61 (8.5%) | 289 (5.9%) |
| WT |  |  |  |
| ＜50 kg | 89 (1.7%) | 18 (2.5%) | 261 (5.4%) |
| ＞100 kg | 38 (0.7%) | 7 (1.0%) | 87 (1.8%) |
| 50～100 kg | 642 (12.4%) | 126 (17.5%) | 2134 (43.7%) |
| WT_Missing | 4426 (85.2%) | 569 (79.0%) | 2396 (49.1%) |
| AGE |  |  |  |
| <18岁 | 23 (0.4%) | 1 (0.1%) | 6 (0.1%) |
| >85岁 | 69 (1.3%) | 4 (0.6%) | 98 (2.0%) |
| 18～64.9岁 | 1860 (35.8%) | 221 (30.7%) | 1169 (24.0%) |
| 65～85岁 | 2192 (42.2%) | 272 (37.8%) | 2271 (46.6%) |
| AGE_Missing | 1051 (20.2%) | 222 (30.8%) | 1334 (27.3%) |
| OCCP_COD |  |  |  |
| CN | 1394 (26.8%) | 187 (26.0%) | 960 (19.7%) |
| HP | 381 (7.3%) | 90 (12.5%) | 194 (4.0%) |
| MD | 2224 (42.8%) | 346 (48.1%) | 3342 (68.5%) |
| OT | 904 (17.4%) | 59 (8.2%) | 41 (0.8%) |
| PH | 272 (5.2%) | 38 (5.3%) | 318 (6.5%) |
| RN | 1 (0.0%) | - | - |
| OCCP_COD_Missing | 19 (0.4%) | - | 23 (0.5%) |
| REPORTER_COUNTRY |  |  |  |
| ALGERIA | 1 (0.0%) | - | - |
| ARGENTINA | 54 (1.0%) | 10 (1.4%) | - |
| AUSTRALIA | 47 (0.9%) | 14 (1.9%) | 42 (0.9%) |
| AUSTRIA | 23 (0.4%) | 15 (2.1%) | 14 (0.3%) |
| BELGIUM | 67 (1.3%) | 16 (2.2%) | 2 (0.0%) |
| BOSNIA AND HERZEGOVINA | 4 (0.1%) | - | - |
| BRAZIL | 123 (2.4%) | 9 (1.3%) | 4 (0.1%) |
| BULGARIA | 41 (0.8%) | 1 (0.1%) | - |
| CANADA | 32 (0.6%) | 4 (0.6%) | 101 (2.1%) |
| CHINA | 332 (6.4%) | 63 (8.8%) | 358 (7.3%) |
| COLOMBIA | 64 (1.2%) | 6 (0.8%) | 9 (0.2%) |
| COSTA RICA | 7 (0.1%) | - | - |
| CROATIA | 13 (0.3%) | - | - |
| CZECHIA | 5 (0.1%) | 1 (0.1%) | - |
| DENMARK | 4 (0.1%) | - | 3 (0.1%) |
| ECUADOR | 11 (0.2%) | - | - |
| EGYPT | 7 (0.1%) | 1 (0.1%) | 4 (0.1%) |
| EL SALVADOR | 4 (0.1%) | 1 (0.1%) | - |
| FINLAND | 18 (0.3%) | 1 (0.1%) | - |
| FRANCE | 160 (3.1%) | 42 (5.8%) | 90 (1.8%) |
| GERMANY | 97 (1.9%) | 11 (1.5%) | 91 (1.9%) |
| GREECE | 15 (0.3%) | 2 (0.3%) | - |
| GUATEMALA | 63 (1.2%) | 1 (0.1%) | - |
| HONDURAS | 11 (0.2%) | 2 (0.3%) | - |
| HONG KONG | 2 (0.0%) | - | 3 (0.1%) |
| HUNGARY | 30 (0.6%) | 7 (1.0%) | - |
| INDIA | 48 (0.9%) | - | 119 (2.4%) |
| INDONESIA | 121 (2.3%) | 3 (0.4%) | 8 (0.2%) |
| IRAN | 8 (0.2%) | 1 (0.1%) | - |
| IRAQ | 2 (0.0%) | - | - |
| IRELAND | 22 (0.4%) | - | 1 (0.0%) |
| ISRAEL | 9 (0.2%) | 1 (0.1%) | 3 (0.1%) |
| ITALY | 120 (2.3%) | 9 (1.3%) | 72 (1.5%) |
| JAPAN | 1397 (26.9%) | 218 (30.3%) | 2621 (53.7%) |
| KAZAKHSTAN | 2 (0.0%) | - | - |
| KENYA | 2 (0.0%) | - | - |
| KOREA, NORTH | 1 (0.0%) | - | - |
| KOREA, SOUTH | 153 (2.9%) | 17 (2.4%) | 111 (2.3%) |
| KUWAIT | 1 (0.0%) | - | - |
| LATVIA | 1 (0.0%) | - | 1 (0.0%) |
| LEBANON | 1 (0.0%) | - | - |
| LITHUANIA | 8 (0.2%) | 1 (0.1%) | - |
| LUXEMBOURG | 1 (0.0%) | - | - |
| MALAYSIA | 10 (0.2%) | - | 10 (0.2%) |
| MEXICO | 161 (3.1%) | 13 (1.8%) | 22 (0.5%) |
| MONTENEGRO | 2 (0.0%) | - | - |
| NETHERLANDS | 38 (0.7%) | 8 (1.1%) | 3 (0.1%) |
| NEW ZEALAND | 3 (0.1%) | - | 2 (0.0%) |
| NICARAGUA | 3 (0.1%) | - | - |
| NORTH MACEDONIA | 1 (0.0%) | - | - |
| NORWAY | 1 (0.0%) | - | 1 (0.0%) |
| OMAN | 1 (0.0%) | - | 1 (0.0%) |
| PAKISTAN | 6 (0.1%) | - | - |
| PANAMA | 1 (0.0%) | - | - |
| PERU | 30 (0.6%) | 2 (0.3%) | - |
| PHILIPPINES | 8 (0.2%) | - | 12 (0.2%) |
| POLAND | 19 (0.4%) | - | 14 (0.3%) |
| PORTUGAL | 30 (0.6%) | 2 (0.3%) | 8 (0.2%) |
| PUERTO RICO | 19 (0.4%) | 4 (0.6%) | - |
| QATAR | 1 (0.0%) | - | - |
| ROMANIA | 14 (0.3%) | 1 (0.1%) | - |
| RUSSIA | 23 (0.4%) | 3 (0.4%) | 29 (0.6%) |
| SAUDI ARABIA | 7 (0.1%) | 1 (0.1%) | 1 (0.0%) |
| SERBIA | 4 (0.1%) | - | - |
| SINGAPORE | 16 (0.3%) | 1 (0.1%) | 3 (0.1%) |
| SLOVAKIA | 2 (0.0%) | - | - |
| SLOVENIA | 58 (1.1%) | 11 (1.5%) | - |
| SOUTH AFRICA | 12 (0.2%) | - | 1 (0.0%) |
| SPAIN | 67 (1.3%) | 9 (1.3%) | 68 (1.4%) |
| SWEDEN | 3 (0.1%) | - | 8 (0.2%) |
| SWITZERLAND | 45 (0.9%) | 14 (1.9%) | 9 (0.2%) |
| SYRIA | 1 (0.0%) | - | - |
| TAIWAN | 122 (2.3%) | 14 (1.9%) | 31 (0.6%) |
| TANZANIA | 1 (0.0%) | - | - |
| THAILAND | 33 (0.6%) | 5 (0.7%) | 63 (1.3%) |
| TUNISIA | 1 (0.0%) | - | - |
| TURKEY | 13 (0.3%) | 2 (0.3%) | 12 (0.2%) |
| UKRAINE | 1 (0.0%) | - | 1 (0.0%) |
| UNITED ARAB EMIRATES | 5 (0.1%) | 1 (0.1%) | - |
| UNITED KINGDOM | 56 (1.1%) | 12 (1.7%) | 23 (0.5%) |
| UNITED STATES | 1218 (23.4%) | 154 (21.4%) | 853 (17.5%) |
| URUGUAY | 3 (0.1%) | - | - |
| VENEZUELA | 5 (0.1%) | - | - |
| VIETNAM | 19 (0.4%) | 5 (0.7%) | 4 (0.1%) |
| COUNTRY NOT SPECIFIED | - | 1 (0.1%) | 19 (0.4%) |
| CHILE | - | - | 23 (0.5%) |
