# Supplementary material for: Comparative Safety Profiling of Sorafenib, Regorafenib, and Lenvatinib in Hepatobiliary-Pancreatic Tumors: Signal Mining and Risk Factor Analysis Using the US FDA Adverse Event Reporting System
Source: Research Square preprint supplement (doi:10.21203/rs.3.rs-8223458/v1), 2026-02-22
Supplement: Supplementary file 5 [file eca509282c40f737f15ae7da.docx]

| soc_name_en | Report number Sorafenib | ROR  (95%Cl) | PRR  (**χ²**) | IC  (IC025) | EBGM  (EBGM05) |
| --- | --- | --- | --- | --- | --- |
| GASTROINTESTINAL DISORDERS | 4088 | 1.09  ( 1.05 - 1.13 ) | 1.07 ( 17.37 ) | 0.07 ( 0.02 ) | 1.05  ( 1.02 ) |
| SKIN AND SUBCUTANEOUS TISSUE DISORDERS | 2924 | 2.39  ( 2.27 - 2.51 ) | 2.23 ( 1178.58 ) | 0.75 ( 0.68 ) | 1.68  ( 1.61 ) |
| NEOPLASMS BENIGN, MALIGNANT AND UNSPECIFIED (INCL CYSTS AND POLYPS) | 2501 | 1.95  ( 1.85 - 2.05 ) | 1.85 ( 628.91 ) | 0.6 ( 0.53 ) | 1.51  ( 1.45 ) |
| MUSCULOSKELETAL AND CONNECTIVE TISSUE DISORDERS | 962 | 1.63  ( 1.5 - 1.76 ) | 1.6 ( 142.16 ) | 0.47 ( 0.36 ) | 1.38  ( 1.29 ) |
| PSYCHIATRIC DISORDERS | 589 | 1.93  ( 1.73 - 2.14 ) | 1.91 ( 152.13 ) | 0.62 ( 0.48 ) | 1.54  ( 1.41 ) |
| SURGICAL AND MEDICAL PROCEDURES | 340 | 2.28  ( 1.97 - 2.63 ) | 2.26 ( 132.4 ) | 0.76 ( 0.57 ) | 1.69  ( 1.5 ) |
| REPRODUCTIVE SYSTEM AND BREAST DISORDERS | 96 | 3.05  ( 2.28 - 4.08 ) | 3.04 ( 62.79 ) | 0.98 ( 0.62 ) | 1.97  ( 1.55 ) |
| SOCIAL CIRCUMSTANCES | 75 | 4.61  ( 3.18 - 6.67 ) | 4.6 ( 79.3 ) | 1.23 ( 0.81 ) | 2.35  ( 1.72 ) |
| EAR AND LABYRINTH DISORDERS | 62 | 1.84  ( 1.33 - 2.54 ) | 1.84 ( 14.27 ) | 0.59 ( 0.16 ) | 1.5  ( 1.15 ) |
